# Supplementary material
Source: PubMed Central journal article supplement (PMC3848397)

**Supplementary table 1.** Comparisons of the *c*-statistics of the prediction rule between the subgroups stratified by age or sex

| Subgroups                  | Derivation cohort             | Validation cohort             | <i>P</i> value <sup>a</sup> |
|----------------------------|-------------------------------|-------------------------------|-----------------------------|
|                            | ( <i>n</i> = 698)             | ( <i>n</i> = 702)             |                             |
|                            | <i>c</i> -statistics (95% CI) | <i>c</i> -statistics (95% CI) |                             |
| Overall population         | 0.87 (0.82 to 0.92)           | 0.89 (0.86 to 0.93)           | 0.39                        |
| Subgroup stratified by age |                               |                               |                             |
| Younger (<30 years)        | 0.86 (0.77 to 0.95)           | 0.90 (0.85 to 0.96)           | 0.41                        |
| Older (≥30 years)          | 0.87 (0.81 to 0.93)           | 0.90 (0.85 to 0.93)           | 0.56                        |
| Subgroup stratified by sex |                               |                               |                             |
| Men                        | 0.88 (0.82 to 0.95)           | 0.88 (0.83 to 0.93)           | 0.90                        |
| Women                      | 0.87 (0.81 to 0.94)           | 0.92 (0.88 to 0.96)           | 0.25                        |

Abbreviation: CI, confidence interval.

<sup>a</sup>*P* value for the differences in *c*-statistics between the derivation and the validation cohorts.

## **Supplemental Figure 1**

**Observed and predicted development of end-stage kidney disease by deciles of risk in the derivation cohorts (A) and the derivation cohorts.**

Hosmer-Lemeshow  $\chi^2$ -statistic = 4.65, d.f. = 8,  $P = 0.79$ .

Supplementary figure 1

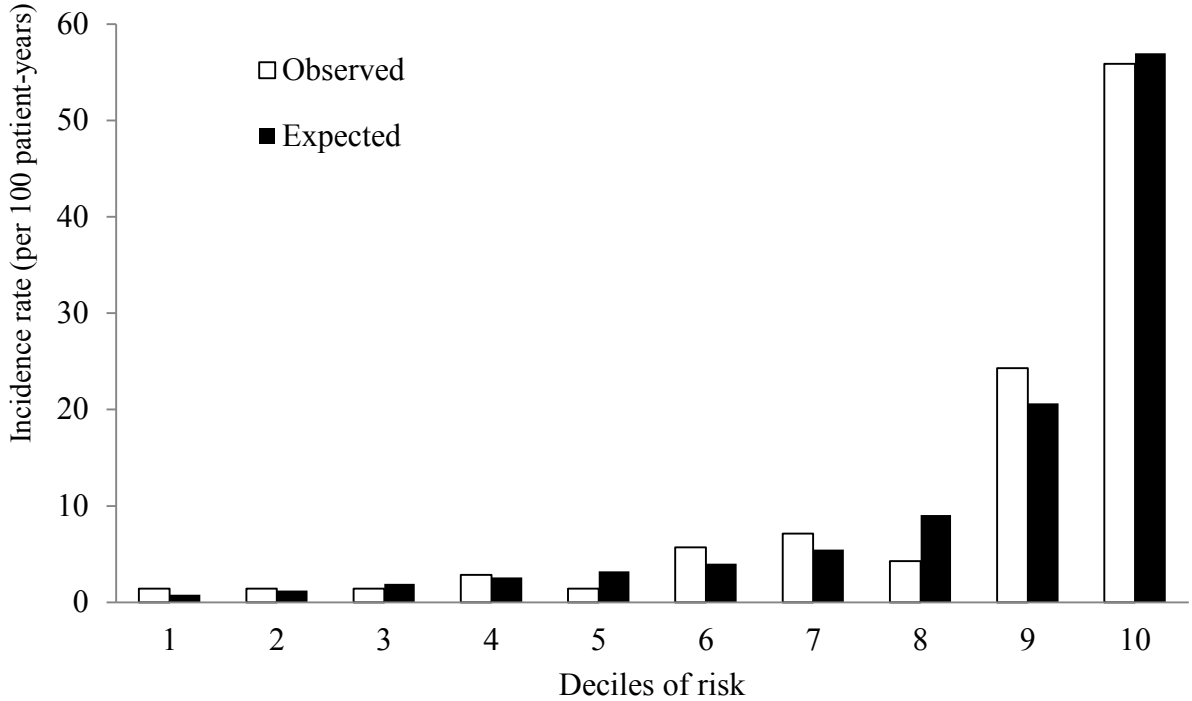

Supplement: CJN.03480413_CJN03480413SupplementaryData.pdf [file CJN.03480413_CJN03480413SupplementaryData.pdf]
